# Supplementary material for: Palliative treatment for malignant gastrointestinal obstruction with peritoneal carcinomatosis: enteral stenting versus surgery
Source: PubMed Central journal article supplement — Endosc Int Open. 2020 Oct 7;8(10):E1487–94. doi: 10.1055/a-1237-3956 (PMC7541184; doi:10.1055/a-1237-3956), 2020-10-07
Supplement: 1840supmat_10-1055-a-1237-3956.pdf [file 1840supmat_10-1055-a-1237-3956.pdf]

## Supplementary material

**Supplementary Fig. 1** **a** Axial and coronal **b** contrast-enhanced computed tomography images demonstrating malignant soft tissue mass (arrows) causing extrinsic compression of the rectosigmoid junction (arrowhead). **c** Endoscopic images demonstrating malignant stenosis in the rectosigmoid colon with near complete obstruction and **d** after stent placement in a patient with appendiceal cancer.

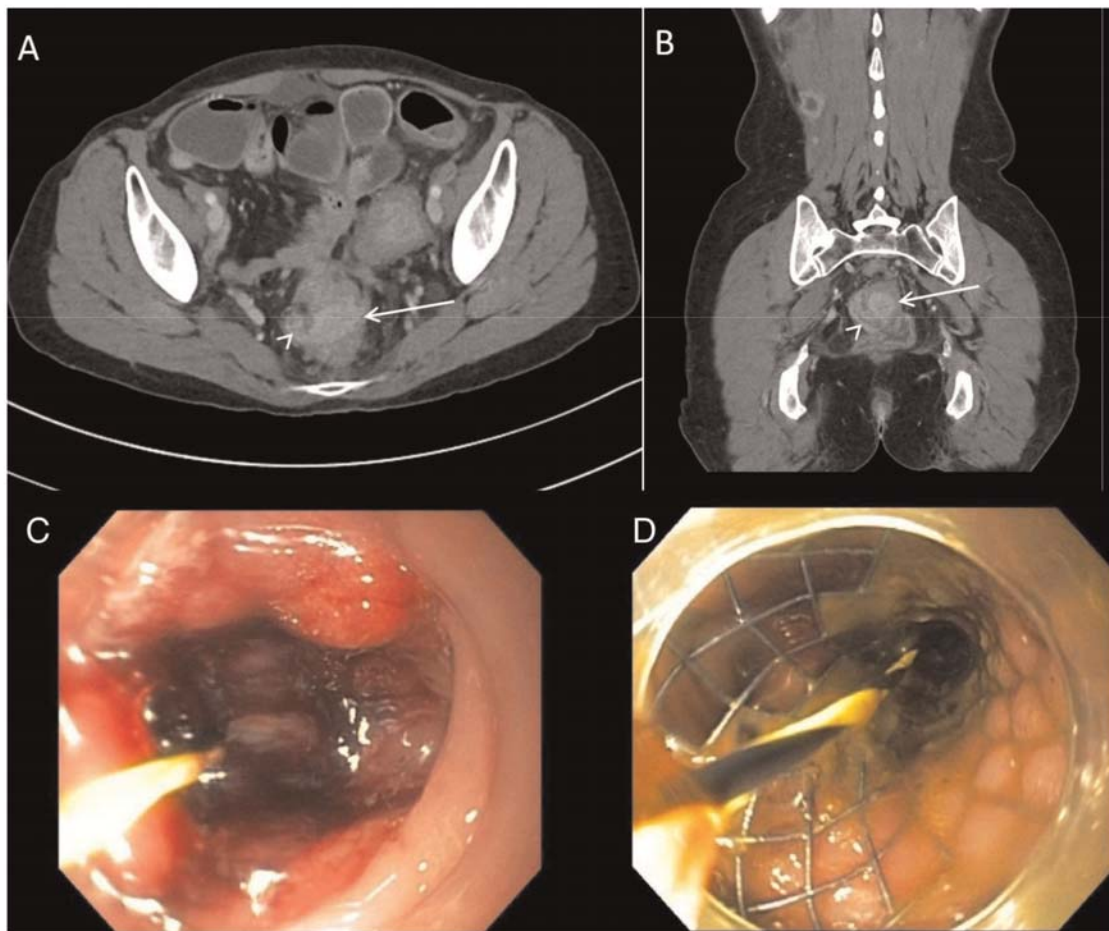

## Supplementary material

**Supplementary Fig. 2** **a** Axial and **b** coronal contrast-enhanced computed tomography, and **c** fluoroscopic upper gastrointestinal series images demonstrating luminal narrowing of the body of the stomach (arrows). There is subtle peritoneal soft tissue nodularity (arrowhead) causing malignant stenosis with associated dilation of the proximal stomach (asterisk). **d** Endoscopic images demonstrating gastric body extrinsic stenosis and **e** after stent placement in a patient with fallopian tube cancer.

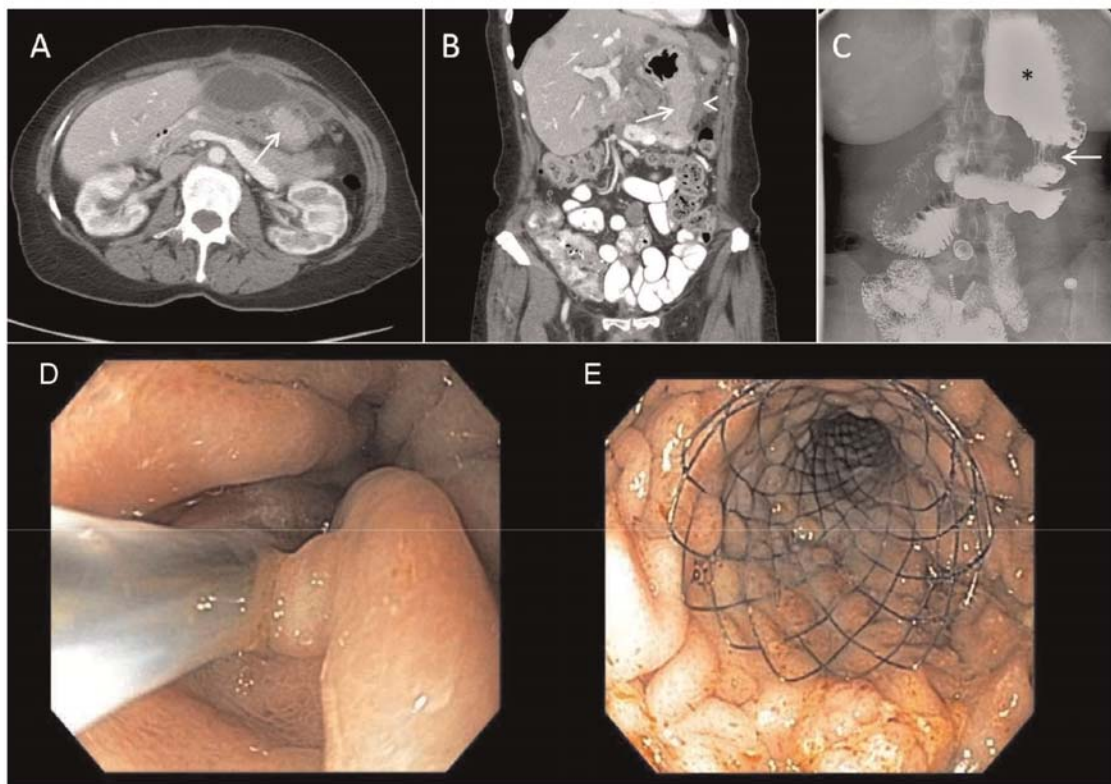

## Supplementary material

**Supplementary Fig. 3** **a** Axial and **b** sagittal contrast-enhanced computed tomography images demonstrating enhancing extrinsic soft tissue mass causing marked stenosis of the rectosigmoid junction (arrows). There is associated dilation of proximal colon containing air fluid levels (arrowheads). **c** Endoscopic images demonstrating severe malignant rectosigmoid stricture and **d** after stent placement in a patient with ovarian cancer.

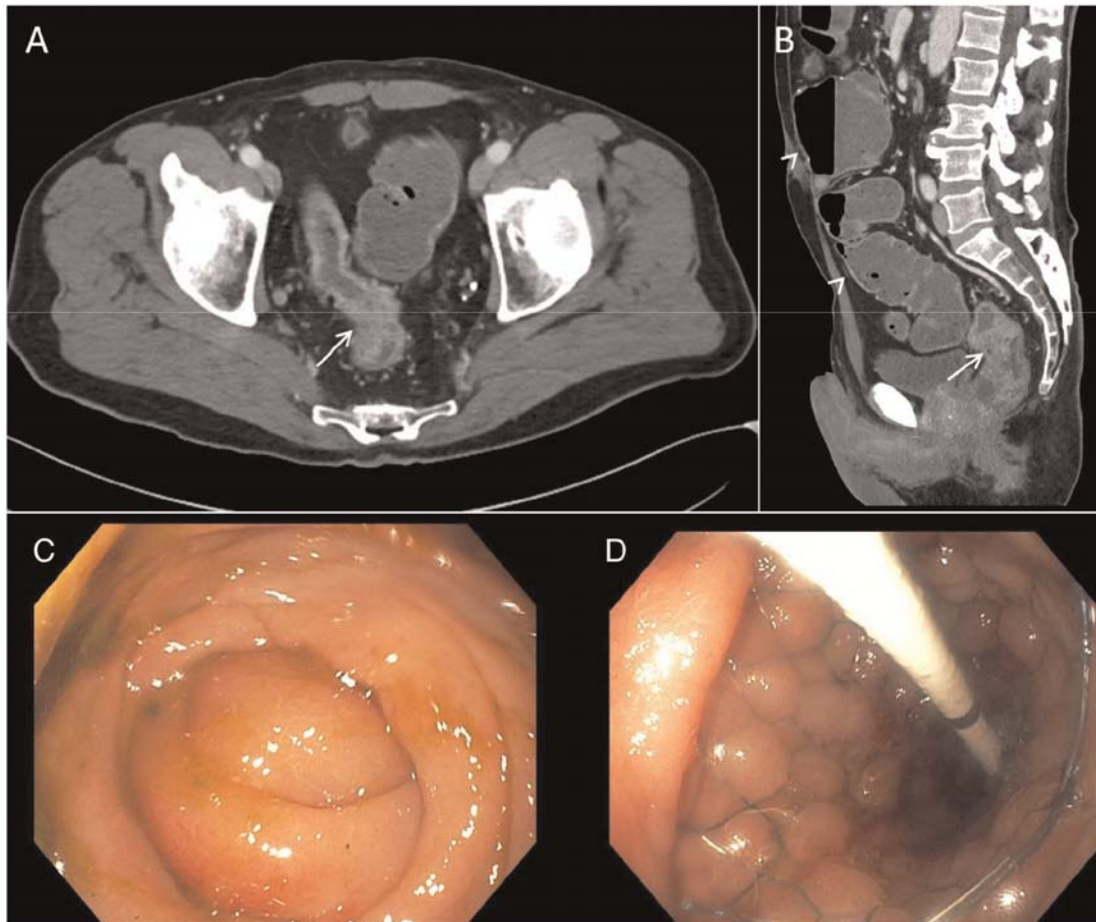

## Supplementary material

**Supplementary Table 1** Subgroup analysis stratified by the site of obstruction for early clinical success after single intervention.

|                                    | Clinical success<br>in the stent group | Clinical success in<br>the surgery group | P-value |
|------------------------------------|----------------------------------------|------------------------------------------|---------|
| Gastric outlet obstruction [n (%)] | 9/9 (100.0)                            | 0/0                                      | -       |
| Small bowel [n (%)]                | 0/2 (0.0)                              | 12/13 (92.3)                             | 0.002   |
| Right colon [n (%)]                | 6/10 (60.0)                            | 5/5 (100.0)                              | 0.10    |
| Left colon [n (%)]                 | 18/30 (60.0)                           | 13/14 (92.9)                             | 0.026   |
| Multiple sites [n (%)]             | 0/2 (0.0)                              | 7/7 (100.0)                              | 0.003   |
| Anastomosis [n (%)]                | 3/4 (75.0)                             | 1/1 (100.0)                              | 0.58    |



## Supplementary material

**Supplementary Table 2** Baseline characteristics of patients with stent success or stent failure.

| Characteristics                                           | Stent failure<br>(n=21)   | Stent success<br>(n=36) | P-value |
|-----------------------------------------------------------|---------------------------|-------------------------|---------|
| Female [n (%)]                                            | 15 (71.4)                 | 24 (66.7)               | 0.47    |
| Age [years, mean $\pm$ SD]                                | 62.2 $\pm$ 15.3           | 59.3 $\pm$ 12.7         | 0.46    |
| Race [caucasian, mean $\pm$ SD]                           | 19 (90.0)                 | 35 (97.2)               | 0.36    |
| BMI (kg/m <sup>2</sup> )                                  | 24.8 $\pm$ 6.3            | 24.7 $\pm$ 5.8          | 0.93    |
| Ascites [n (%)]                                           | 17 (81.0)                 | 28 (77.8)               | 0.53    |
| ECOG                                                      |                           |                         | 0.38    |
| 0-1                                                       | 8 (38.1)                  | 18 (50.0)               |         |
| 2-4                                                       | 13 (61.9)                 | 18 (50.0)               |         |
| Histologic grade [high grade, n (%)]                      | 17 (81.0)                 | 31 (86.1)               | 0.61    |
| Severity of PC [n (%)]                                    |                           |                         | 0.29    |
| Mild                                                      | 13 (61.9)                 | 27 (75.0)               |         |
| Moderate                                                  | 4 (19.0)                  | 5 (13.9)                |         |
| Severe                                                    | 4 (19.0)                  | 4 (11.1)                |         |
| Chemotherapy [n (%)]                                      | 11 (52.4)                 | 26 (72.2)               | 0.13    |
| Radiotherapy [n (%)]                                      | 2 (9.5)                   | 6 (16.7)                | 0.37    |
| Type of cancer                                            |                           |                         | 0.95    |
| Urogynecological                                          | 6 (28.6)                  | 10 (27.8)               |         |
| Other cancer                                              | 15 (71.4)                 | 26 (72.2)               |         |
| Diagnosis of PC [n (%)]                                   |                           |                         | 0.24    |
| Imaging                                                   | 12 (57.1)                 | 26 (72.2)               |         |
| Cytology/histology                                        | 9 (42.9)                  | 10 (27.8)               |         |
| Single or multiple sites of obstruction [multiple, n (%)] | 2 (9.5)                   | 0                       | 0.13    |
| Site of obstruction                                       |                           |                         | 0.028   |
| Gastric outlet obstruction                                | 0                         | 9 (25)                  |         |
| Small bowel                                               | 2 (9.5)                   | 0                       |         |
| Colon (not rectosigmoid)                                  | 5 (23.8)                  | 8 (22)                  |         |
| Rectosigmoid colon                                        | 11 (52.4)                 | 16 (44.4)               |         |
| Multiple sites                                            | 2 (9.5)                   | 0                       |         |
| Anastomosis                                               | 1 (4.8)                   | 3 (8.3)                 |         |
| Degree of obstruction [complete obstruction, n (%)]       | 7 (33.3)                  | 10 (27.8)               | 0.66    |
| Obstruction length (cm)                                   | 7.7 $\pm$ 7.5             | 4.9 $\pm$ 2.8           | 0.23    |
| Intrinsic or extrinsic obstruction [intrinsic, n (%)]     | 9 (42.9)                  | 16 (45.7)               | 0.84    |
| No. of stents (1/2/3)                                     | 13/2/6<br>(61.9/9.5/28.6) | 32/4/0<br>(88.9/11.1/0) | 0.003   |
| Length of obstruction (cm)                                |                           |                         |         |

**Abbreviations:** BMI: body mass index; ECOG: Eastern Cooperative Oncology Group; PC: peritoneal carcinomatosis
